# Supplementary material for: Axial coordination engineering for single-atom catalysts in bifunctional oxidation of NO and mercury
Source: Royal Society of Chemistry journal article supplement (doi:10.1039/d5cp01745a), 2025-01-01
Supplement: d5cp01745a1.pdf [file d5cp01745a1.pdf]

## Supporting Information

### **Axial Coordination Engineering for Single-Atom Catalysts in Bifunctional Oxidation NO and Mercury**

Jianghao Cai <sup>a, b</sup>, Tongao Yao <sup>a, b</sup>, Haoqi Tian <sup>a, b</sup>, XiaoTian Tang <sup>a, b</sup>, Yutong Jiang <sup>a, b</sup>, Ruiyang Shi <sup>a, b</sup>,  
Binghui Zhou <sup>a, b</sup>, Zhengyang Gao <sup>a, b</sup>, Weijie Yang <sup>a, b, \*</sup>

<sup>a</sup> Department of Power Engineering, School of Energy, Power and Mechanical Engineering, North China Electric Power University, Baoding, 071003, China

<sup>b</sup> Hebei Key Laboratory of Low Carbon and High Efficiency Power Generation Technology, North China Electric Power University, Baoding, 071003, Hebei, China

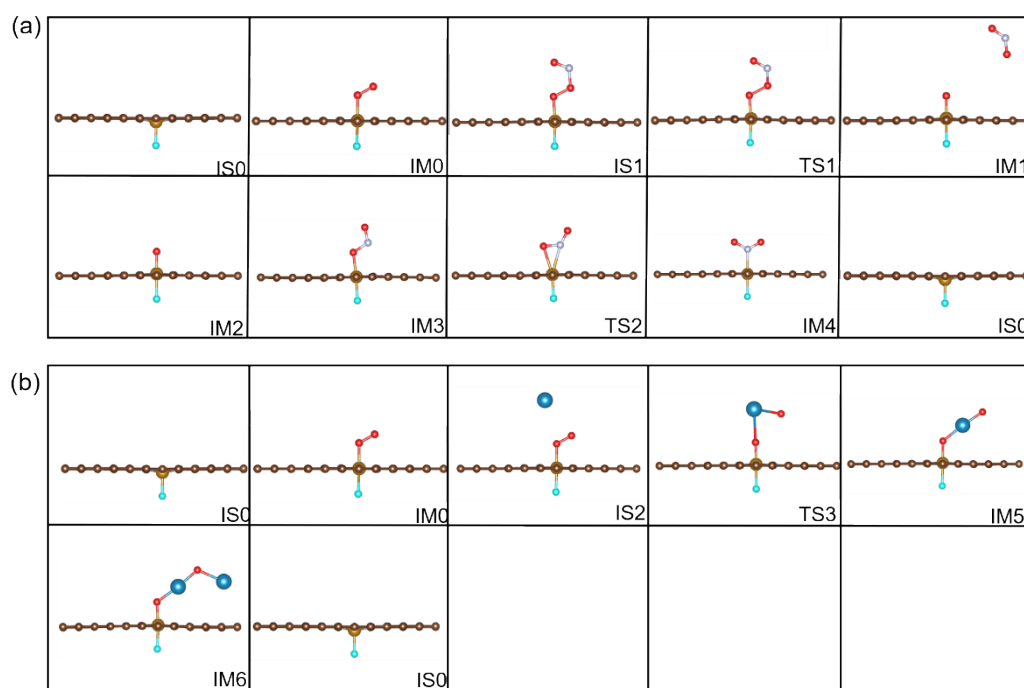

Figure S1. (a) Oxidation pathway of NO on  $\text{Fe}_1\text{N}_4\text{-F}$ . (b) Oxidation pathway of  $\text{Hg}^0$  on  $\text{Fe}_1\text{N}_4\text{-F}$ .

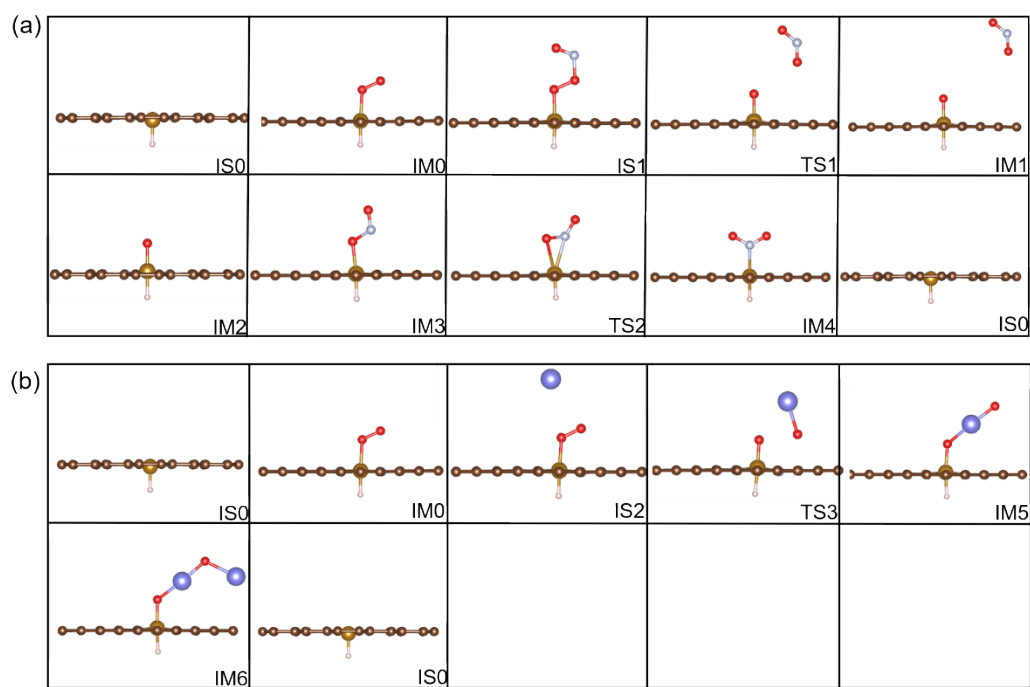

**Figure S2. (a) Oxidation pathway of NO on  $\text{Fe}_1\text{N}_4\text{-H}$ . (b) Oxidation pathway of  $\text{Hg}^0$  on  $\text{Fe}_1\text{N}_4\text{-H}$ .**

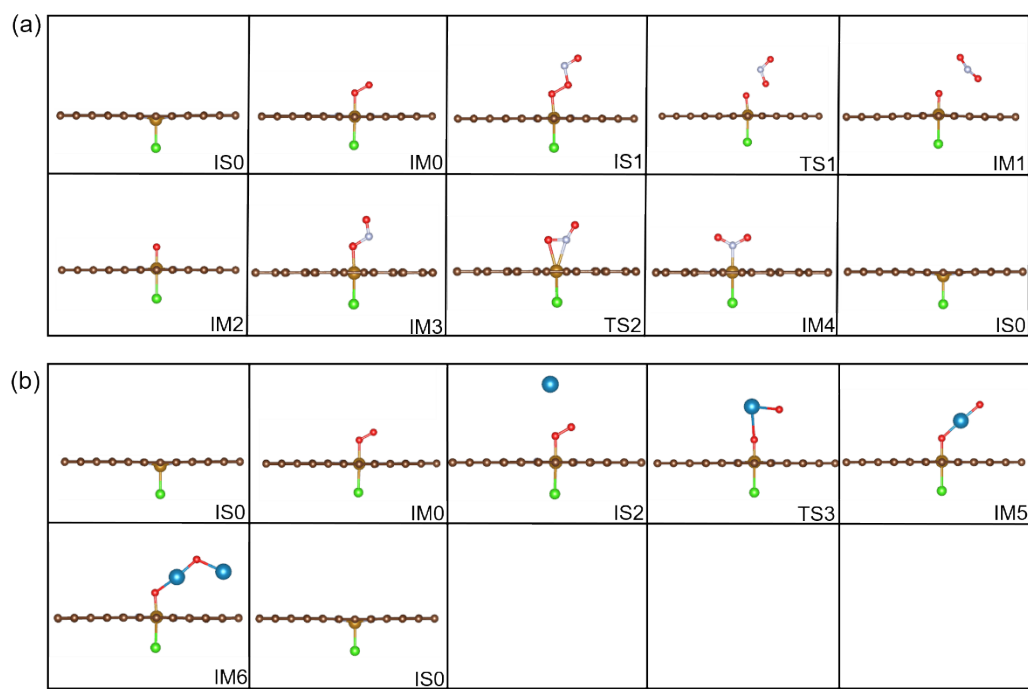

**Figure S3. (a) Oxidation pathway of NO on  $\text{Fe}_1\text{N}_4\text{-Cl}$ . (b) Oxidation pathway of  $\text{Hg}^0$  on  $\text{Fe}_1\text{N}_4\text{-Cl}$ .**

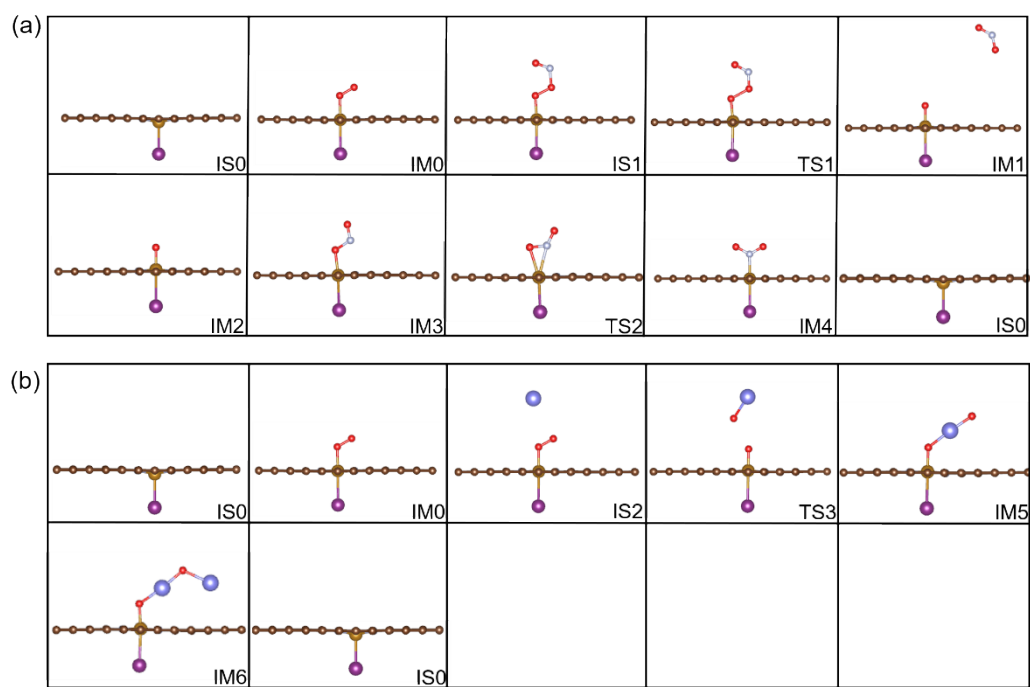

**Figure S4. (a) Oxidation pathway of NO on  $\text{Fe}_1\text{N}_4\text{-I}$ . (b) Oxidation pathway of  $\text{Hg}^0$  on  $\text{Fe}_1\text{N}_4\text{-I}$ .**

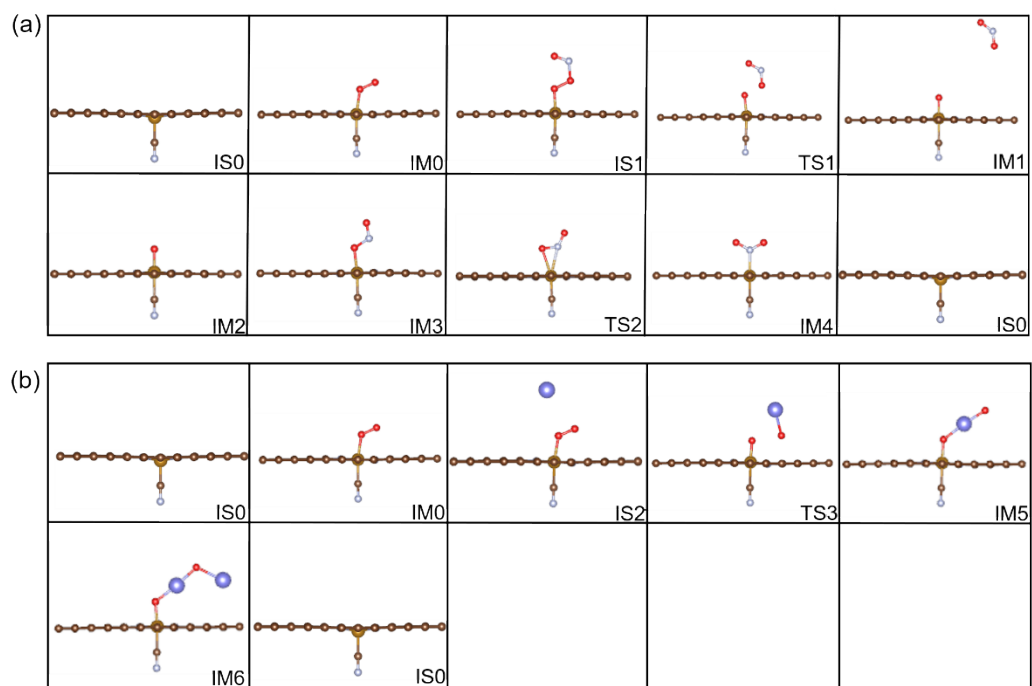

Figure S5. (a) Oxidation pathway of NO on  $\text{Fe}_1\text{N}_4\text{-CN}$ . (b) Oxidation pathway of  $\text{Hg}^0$  on  $\text{Fe}_1\text{N}_4\text{-CN}$ .

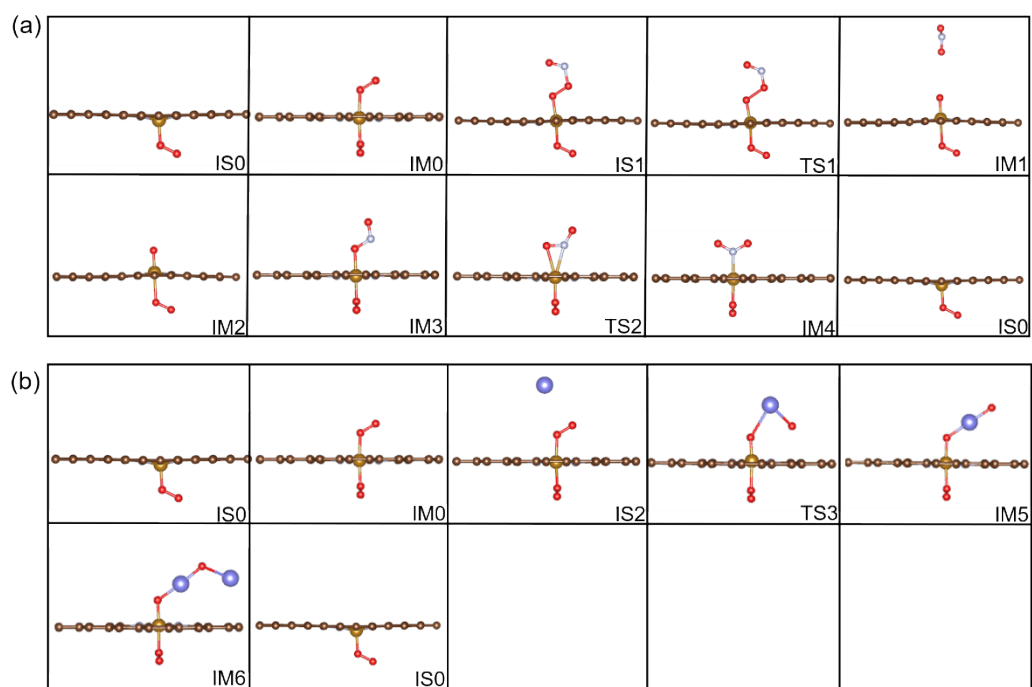

**Figure S6. (a) Oxidation pathway of NO on  $\text{Fe}_1\text{N}_4\text{-O}_2$ . (b) Oxidation pathway of  $\text{Hg}^0$  on  $\text{Fe}_1\text{N}_4\text{-O}_2$ .**

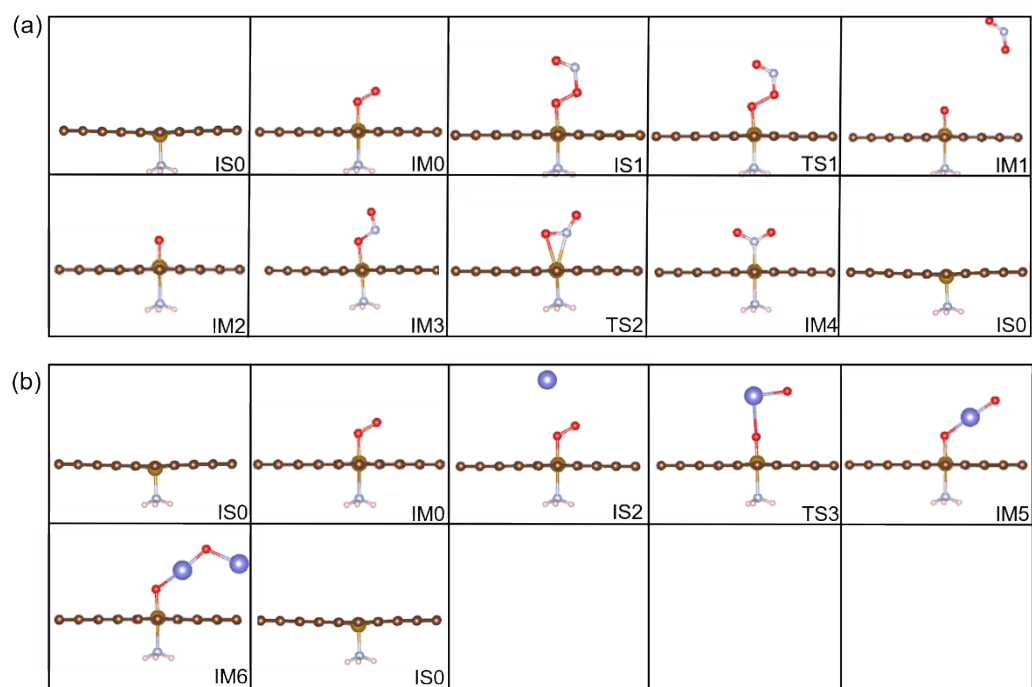

**Figure S7. (a) Oxidation pathway of NO on  $\text{Fe}_1\text{N}_4\text{-NH}_3$ . (b) Oxidation pathway of  $\text{Hg}^0$  on  $\text{Fe}_1\text{N}_4\text{-NH}_3$ .**

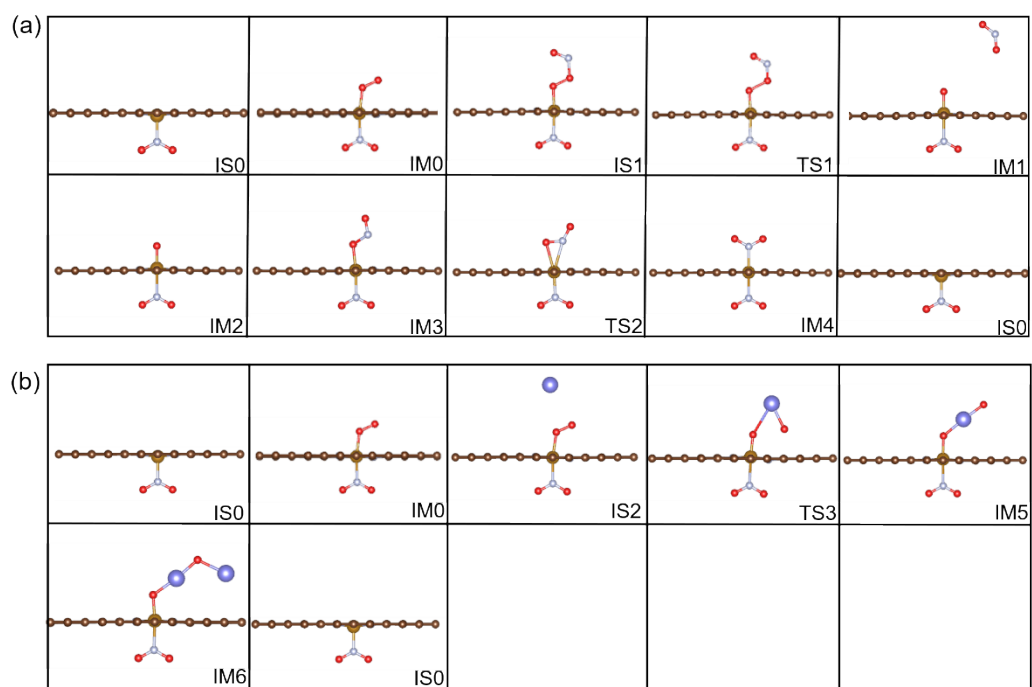

**Figure S8. (a) Oxidation pathway of NO on  $\text{Fe}_1\text{N}_4\text{-NO}_2$ . (b) Oxidation pathway of  $\text{Hg}^0$  on  $\text{Fe}_1\text{N}_4\text{-NO}_2$ .**

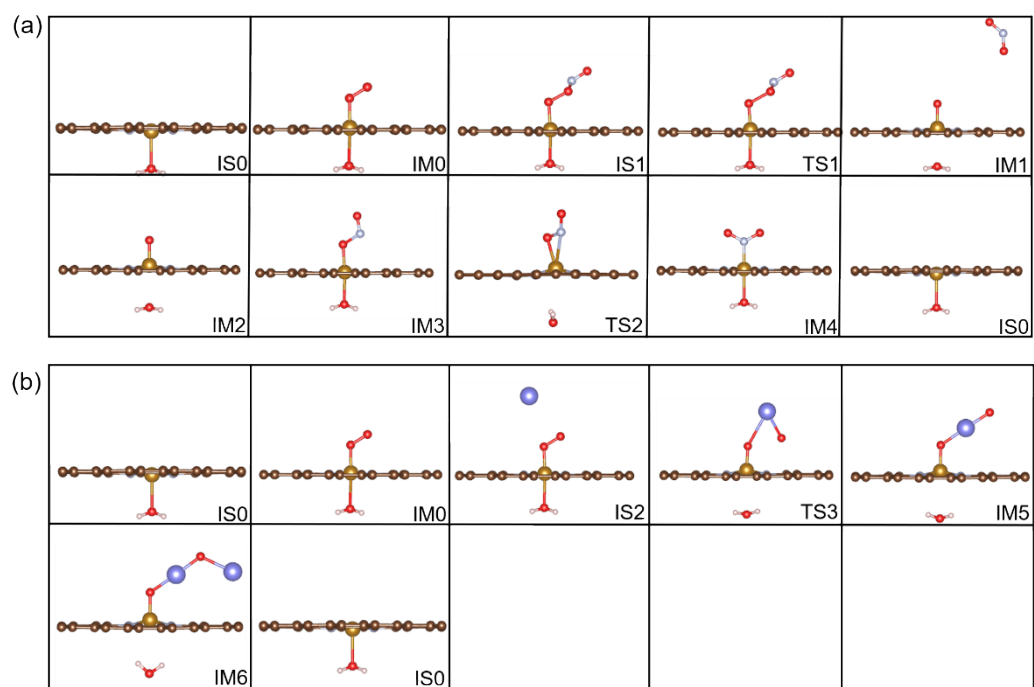

**Figure S9. (a) Oxidation pathway of NO on  $\text{Fe}_1\text{N}_4\text{-H}_2\text{O}$ . (b) Oxidation pathway of  $\text{Hg}^0$  on  $\text{Fe}_1\text{N}_4\text{-H}_2\text{O}$ .**

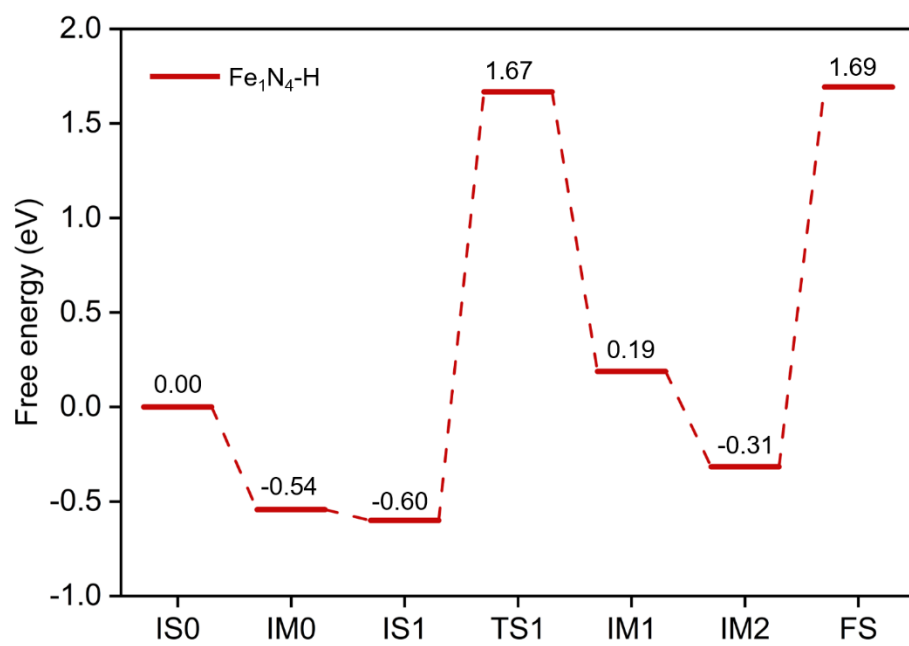

Figure S10. Free energy diagram of NO oxidation on Fe<sub>1</sub>N<sub>4</sub>-H.

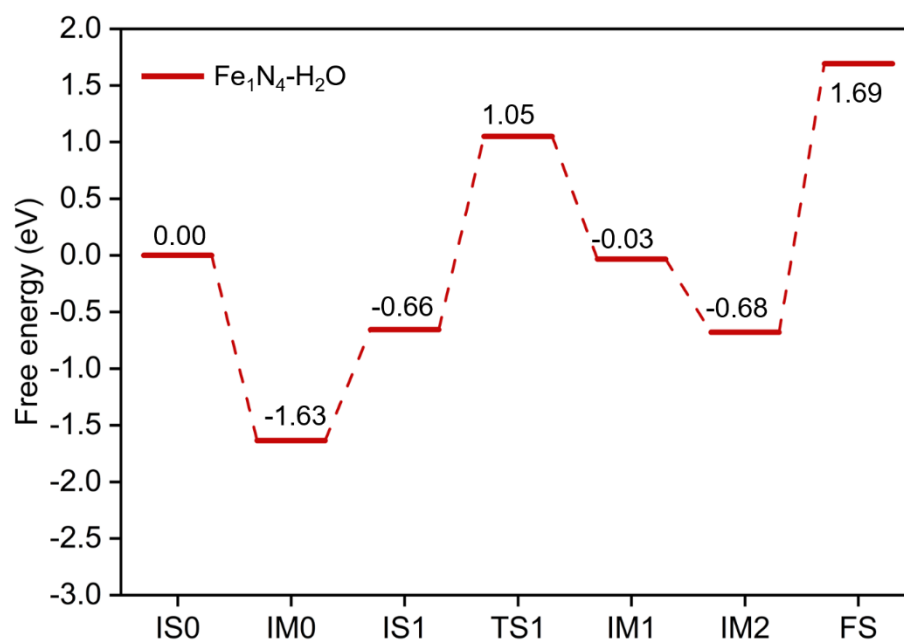

Figure S11. Free energy diagram of NO oxidation on Fe<sub>1</sub>N<sub>4</sub>-H<sub>2</sub>O.

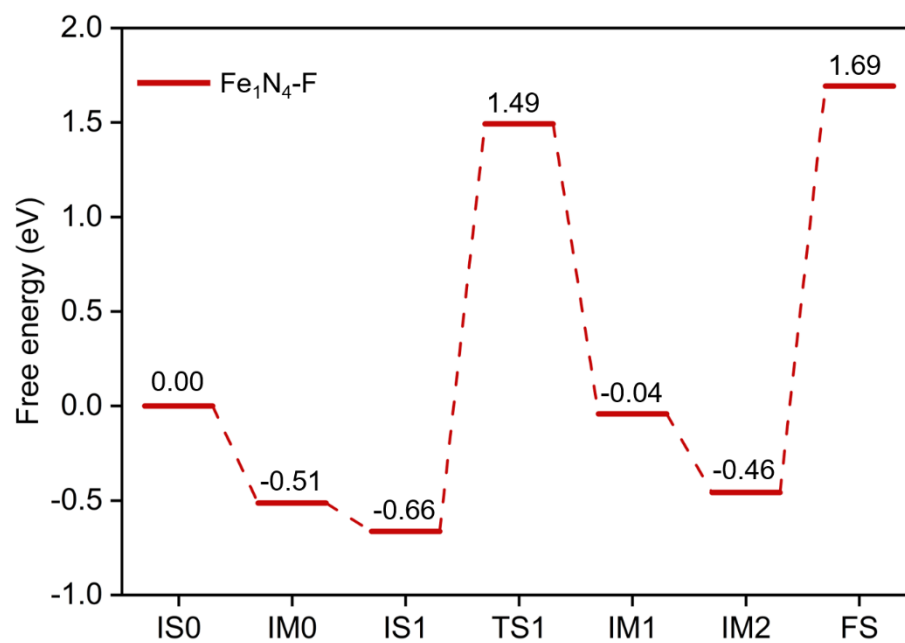

Figure S12. Free energy diagram of NO oxidation on Fe<sub>1</sub>N<sub>4</sub>-F.

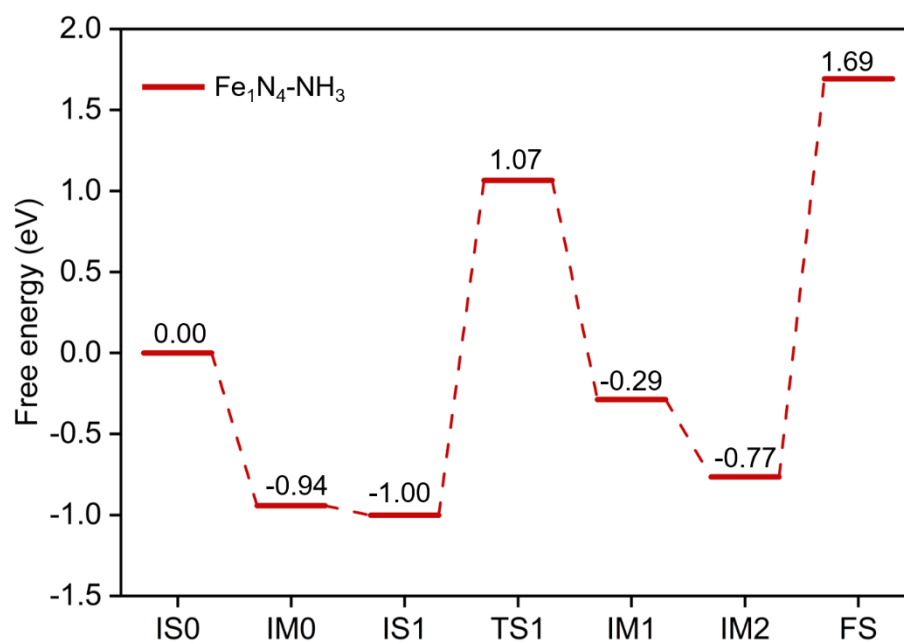

Figure S13. Free energy diagram of NO oxidation on Fe<sub>1</sub>N<sub>4</sub>-NH<sub>3</sub>.

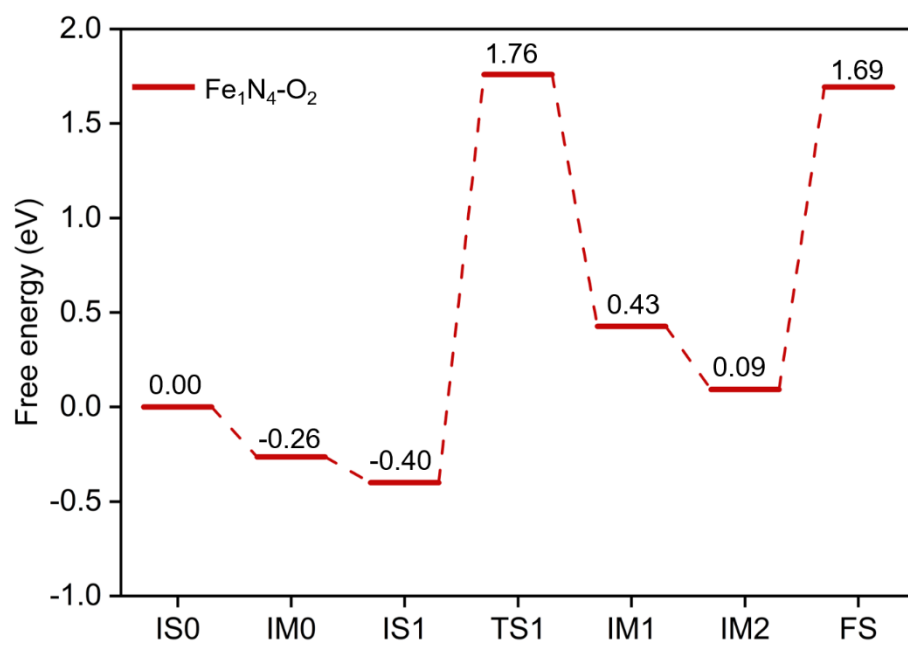

Figure S14. Free energy diagram of NO oxidation on Fe<sub>1</sub>N<sub>4</sub>-O<sub>2</sub>.

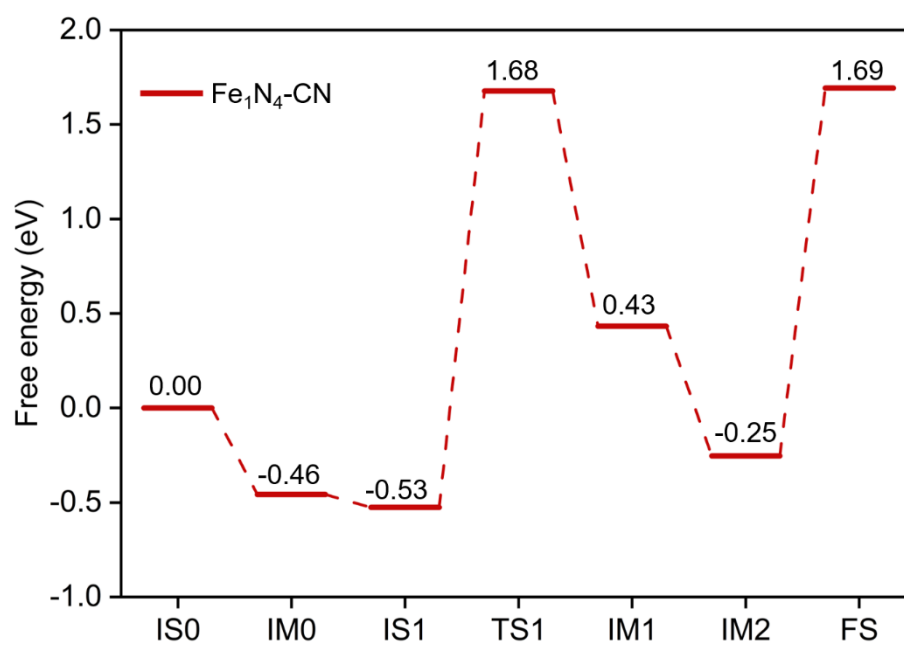

Figure S15. Free energy diagram of NO oxidation on Fe<sub>1</sub>N<sub>4</sub>-CN.

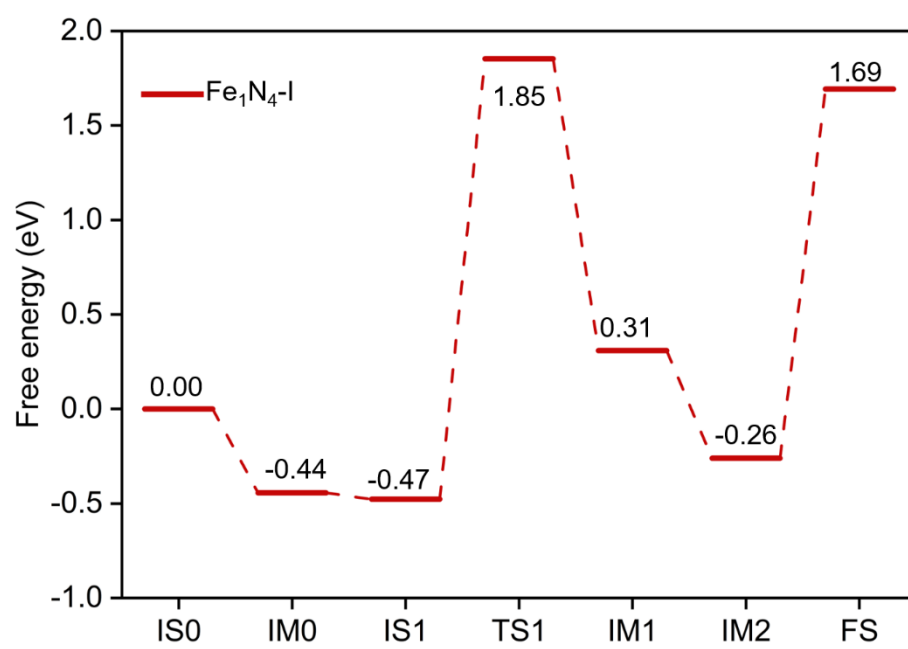

Figure S16. Free energy diagram of NO oxidation on Fe<sub>1</sub>N<sub>4</sub>-I.

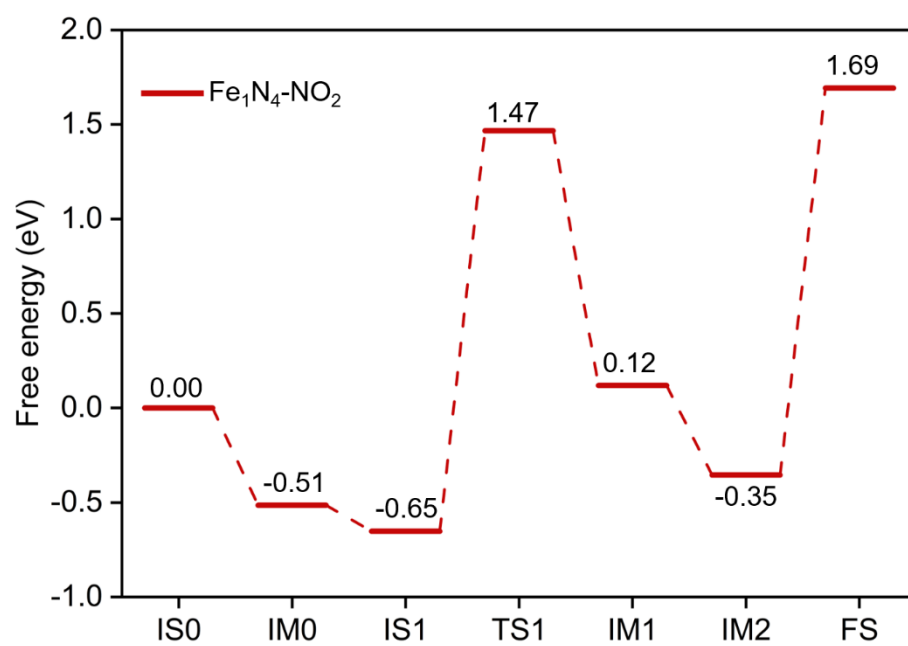

Figure S17. Free energy diagram of NO oxidation on  $\text{Fe}_1\text{N}_4\text{-NO}_2$ .

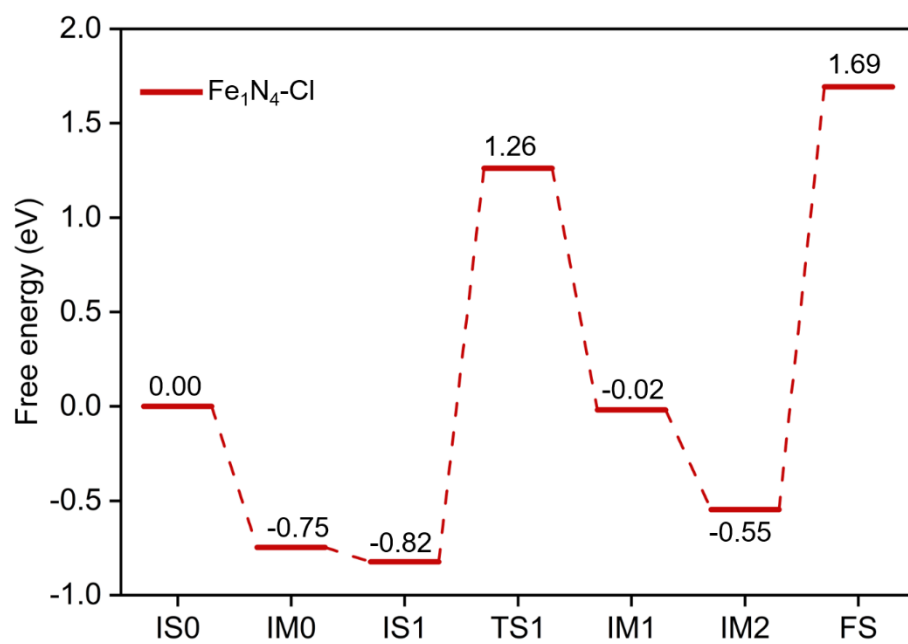

Figure S18. Free energy diagram of NO oxidation on  $\text{Fe}_1\text{N}_4\text{-Cl}$ .

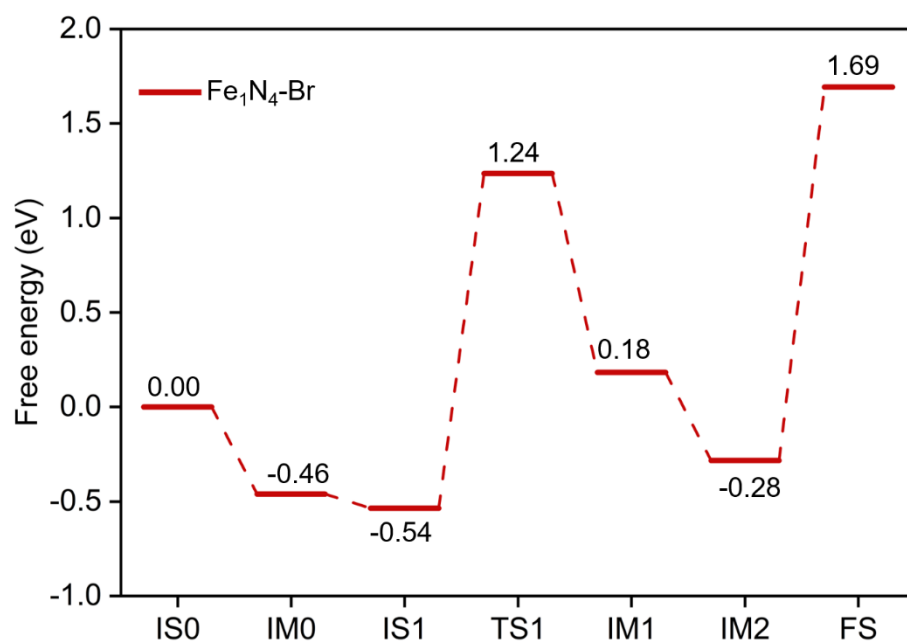

Figure S19. Free energy diagram of NO oxidation on Fe<sub>1</sub>N<sub>4</sub>-Br.

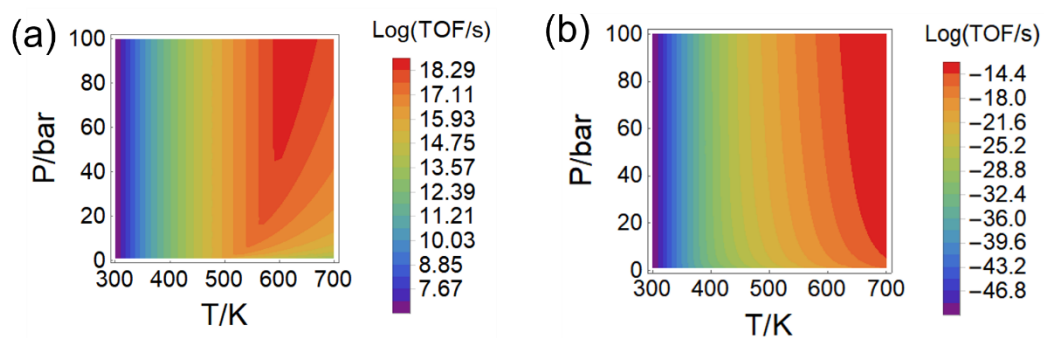

**Figure S20. Microkinetic modeling analyses of the overall flue gas pressure and temperature functions in the process of catalytic oxidation NO by  $\text{Fe}_1\text{N}_4\text{-Cl}$ .**

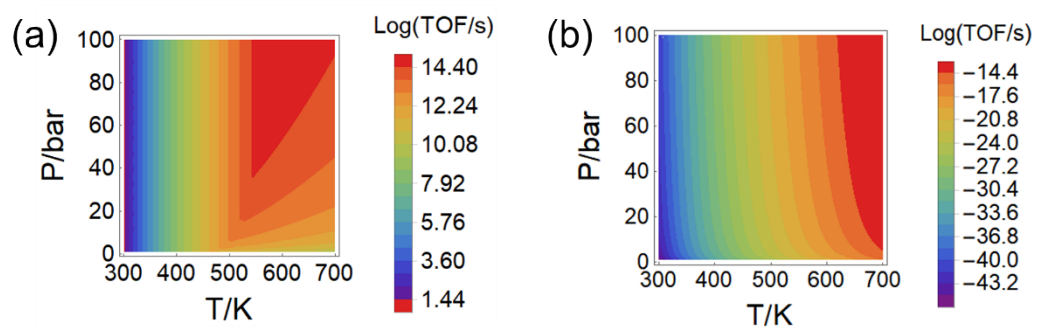

**Figure S21. Microkinetic modeling analyses of the overall flue gas pressure and temperature functions in the process of catalytic oxidation NO by  $\text{Fe}_1\text{N}_4\text{-Br}$ .**

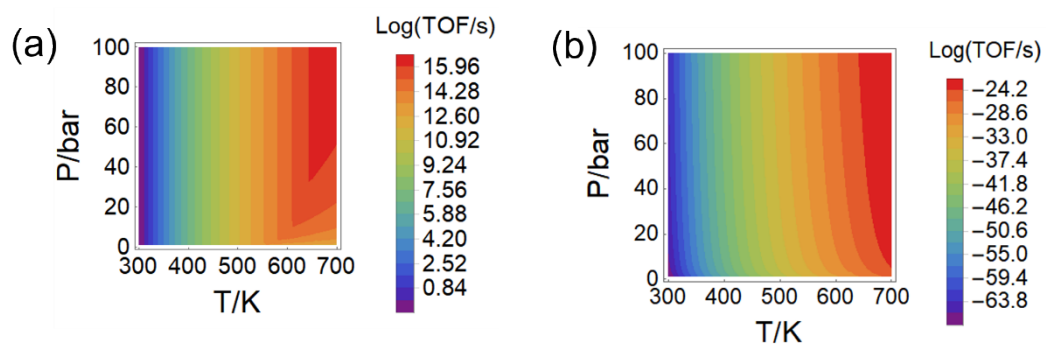

**Figure S22. Microkinetic modeling analyses of the overall flue gas pressure and temperature functions in the process of catalytic oxidation NO by  $\text{Fe}_1\text{N}_4\text{-I}$ .**

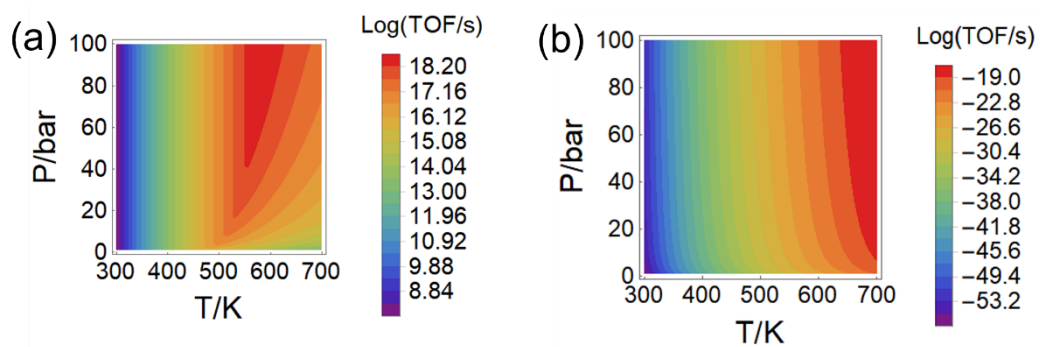

**Figure S23. Microkinetic modeling analyses of the overall flue gas pressure and temperature functions in the process of catalytic oxidation NO by  $\text{Fe}_1\text{N}_4\text{-NO}_2$ .**

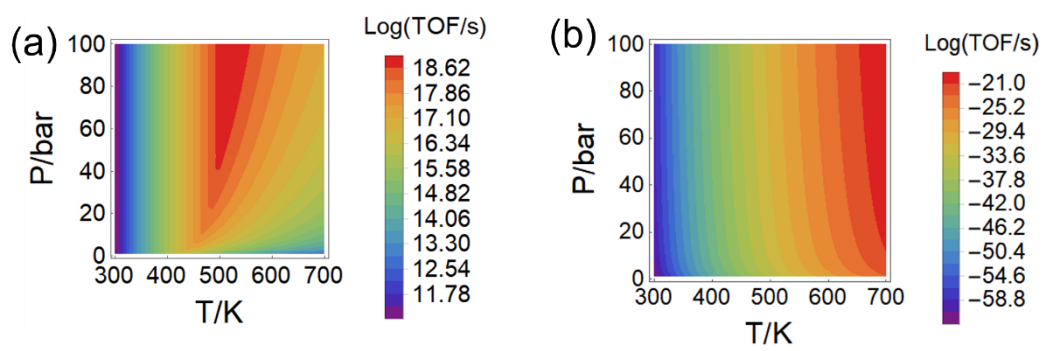

**Figure S24. Microkinetic modeling analyses of the overall flue gas pressure and temperature functions in the process of catalytic oxidation NO by Fe<sub>1</sub>N<sub>4</sub>-H.**

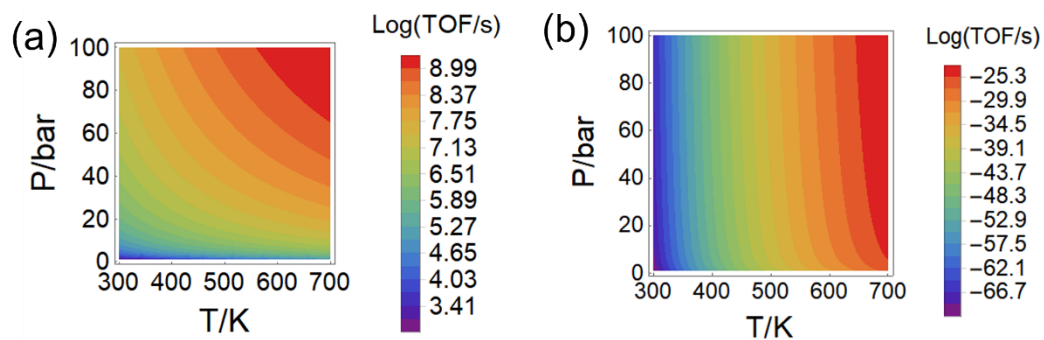

Figure S25. Microkinetic modeling analyses of the overall flue gas pressure and temperature functions in the process of catalytic oxidation NO by  $\text{Fe}_1\text{N}_4\text{-O}_2$ .

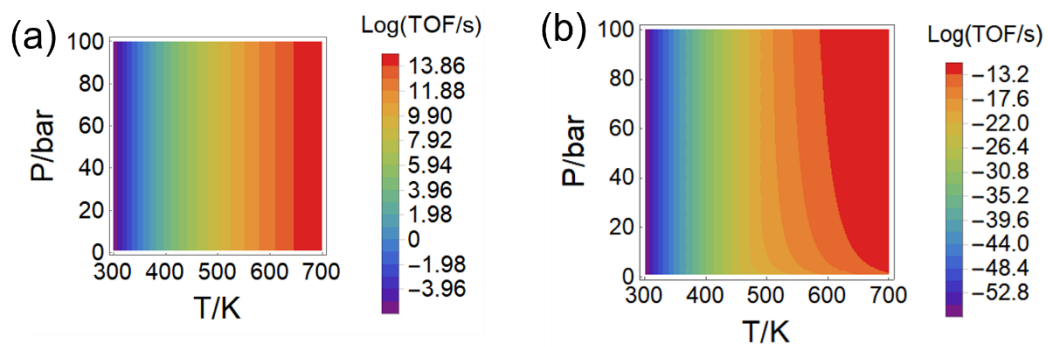

**Figure S26. Microkinetic modeling analyses of the overall flue gas pressure and temperature functions in the process of catalytic oxidation NO by  $\text{Fe}_1\text{N}_4\text{-NH}_3$ .**
